# Supplementary material for: Pacific climate reflected in Waipuna Cave dripwater hydrochemistry
Source: Copernicus journal article supplement (doi:10.5194/hess-2019-647), 2020-01-27

# Pacific climate reflected in Waipuna Cave dripwater hydrochemistry

Nava-Fernández et al.

Correspondence to: Cinthya E. Nava Fernández (cinthya.navafernandez@rub.de)

**S1.** Waipuna Cave drip sites organized by their discharge variability according to the classification of Smart and Friedrich 1987.

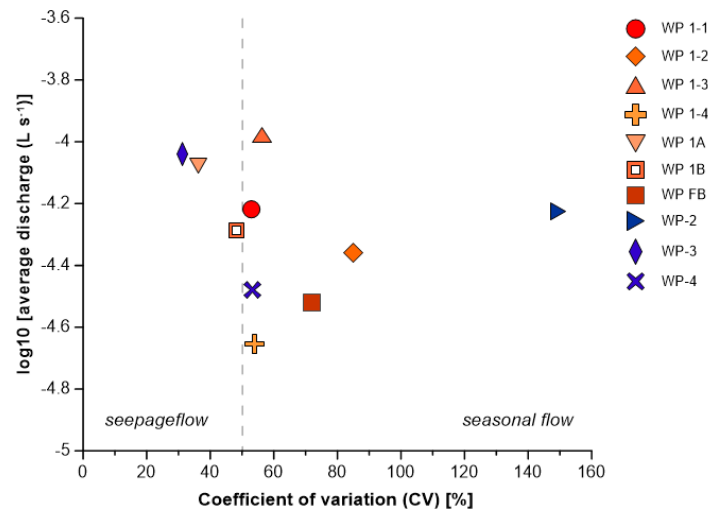

**S2.**  $\delta^{17}\text{O}$  versus  $\delta^{18}\text{O}$  values of Waipuna Cave dripwaters (pink circles) and Waipuna stream (green diamonds).

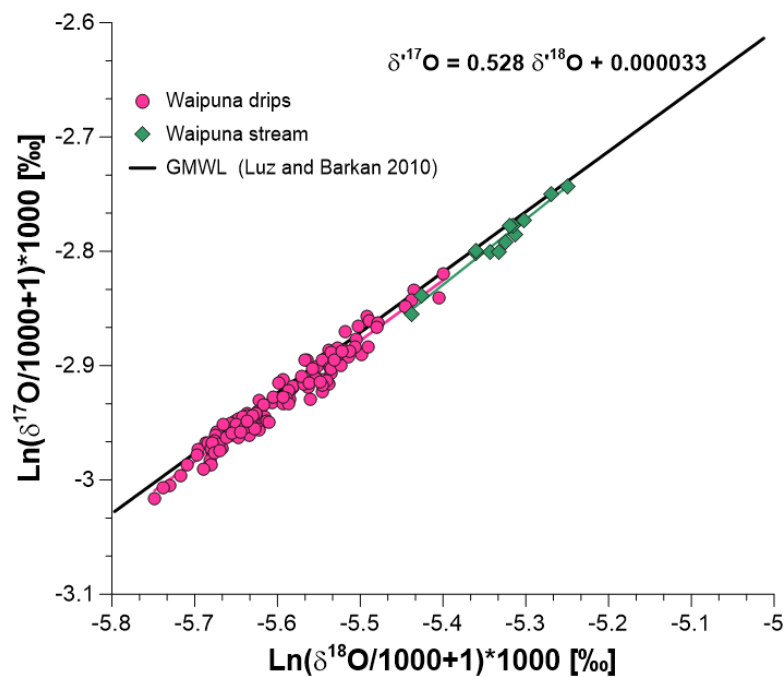

**S3.** Dripwater  $\delta D$  time series of all drips grouped according to the three main response lags (5, 18, and 24 days) to antecedent rainfall (AR) at Otorohanga Glenbrook station (blue vertical bars).

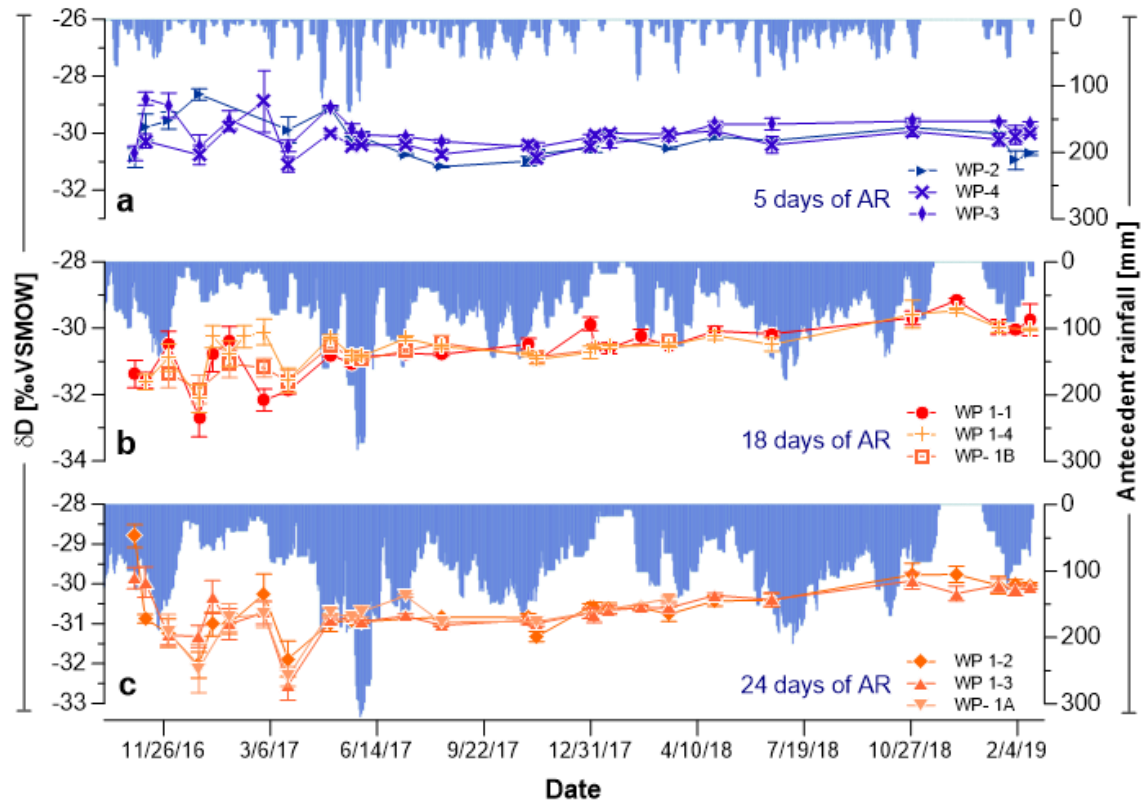

**S4.** Dripwater  $\delta^{17}O$  time series of all drips grouped according to the three main response lags (5, 18, and 24 days) to antecedent rainfall (AR) at Otorohanga Glenbrook station (blue vertical bars).

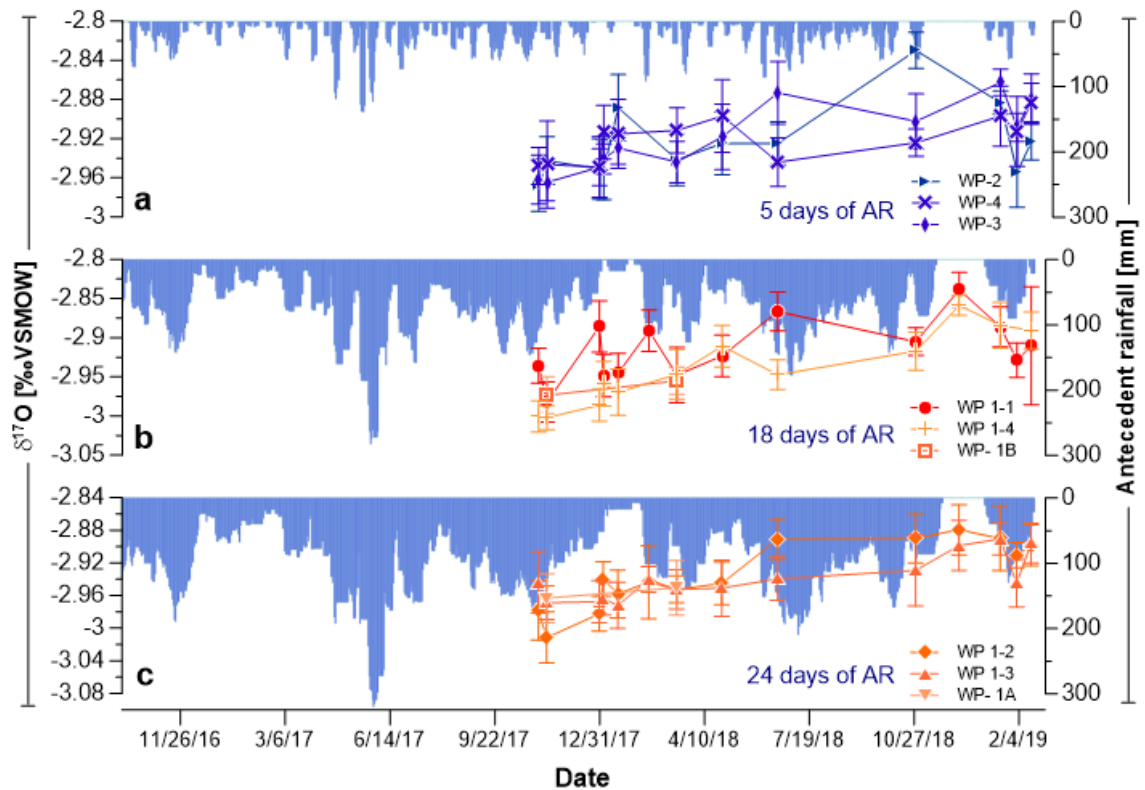

**S5.**  $^{17}\text{O}_{\text{excess}}$  time series of all drips grouped according to the three main response lags (5, 18, and 24 days) to antecedent rainfall (AR) at Otorohanga Glenbrook station (blue vertical bars).

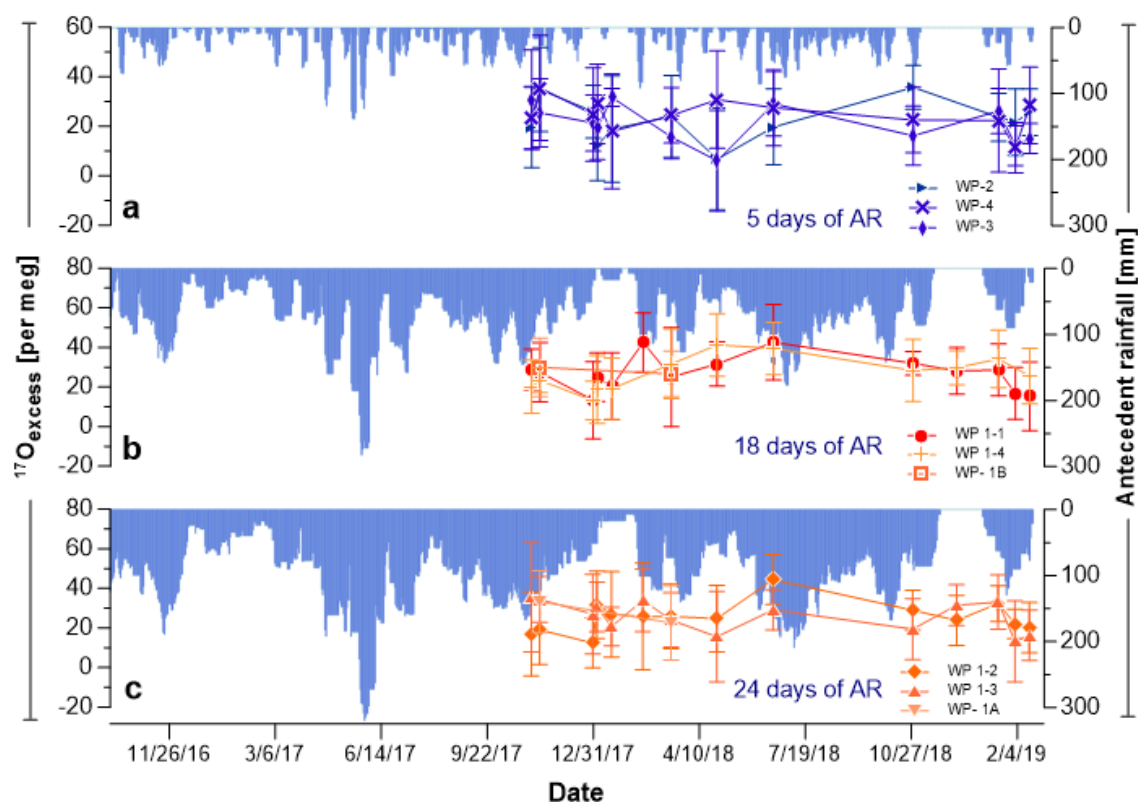

**S6.** Dripwater d-excess of all drips grouped according to the three main response lags (5, 18, and 24 days) to antecedent rainfall (AR) at Otorohanga Glenbrook station (blue vertical bars).

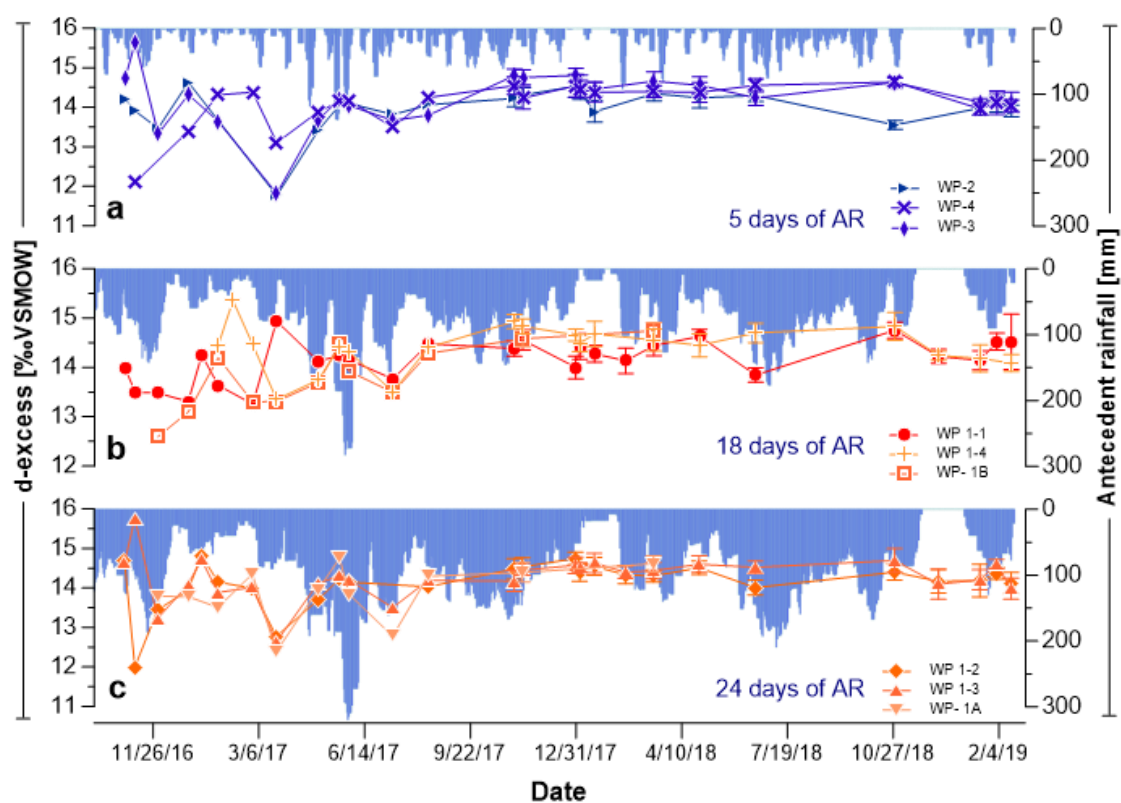

**S7.** Dripwater Sr/Ca ratios of all drips grouped according to the three main response lags (5, 18, and 24 days) to antecedent rainfall (AR) at Otorohanga Glenbrook station (blue vertical bars).

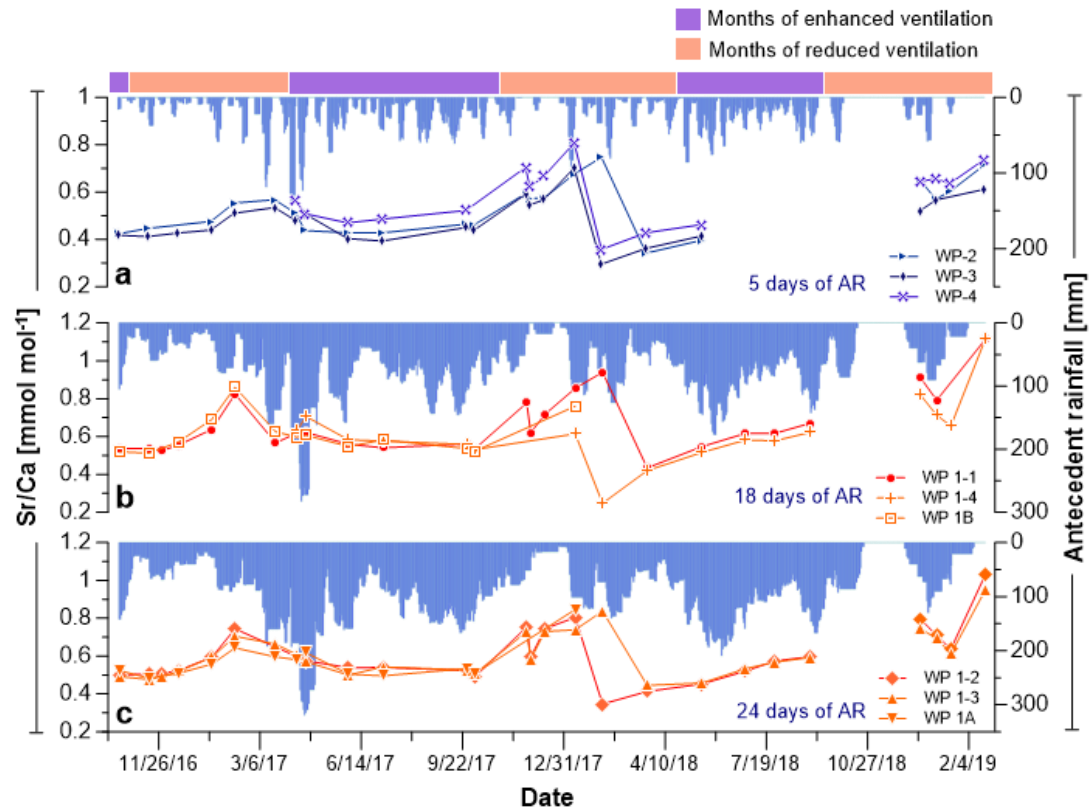

**S8.** Mg/Ca and Sr/Ca ratios sorted by the period of reduced ventilation November-March (orange circles) and enhanced ventilation April-October (blue diamonds).

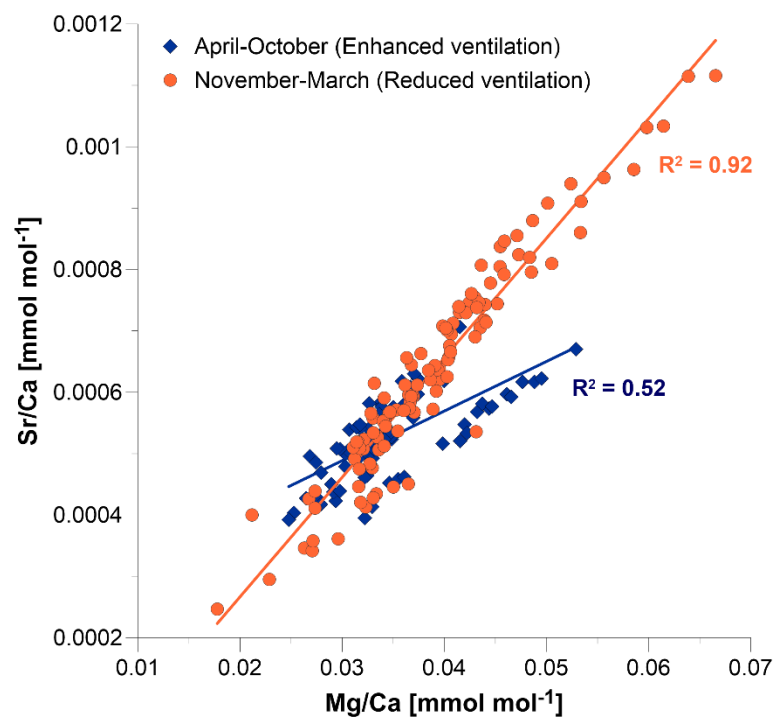

Supplement: Supplementary file 1 [file hess-2019-647-supplement.zip]
